# Supplementary material
Source: HighWire-hosted journal article supplement (http://erj.ersjournals.com/highwire/filestream/113033/field_highwire_adjunct_files/2/Online_Figure_F.pdf)

OE-R-nNO as a function of age in PCD, CF and HC

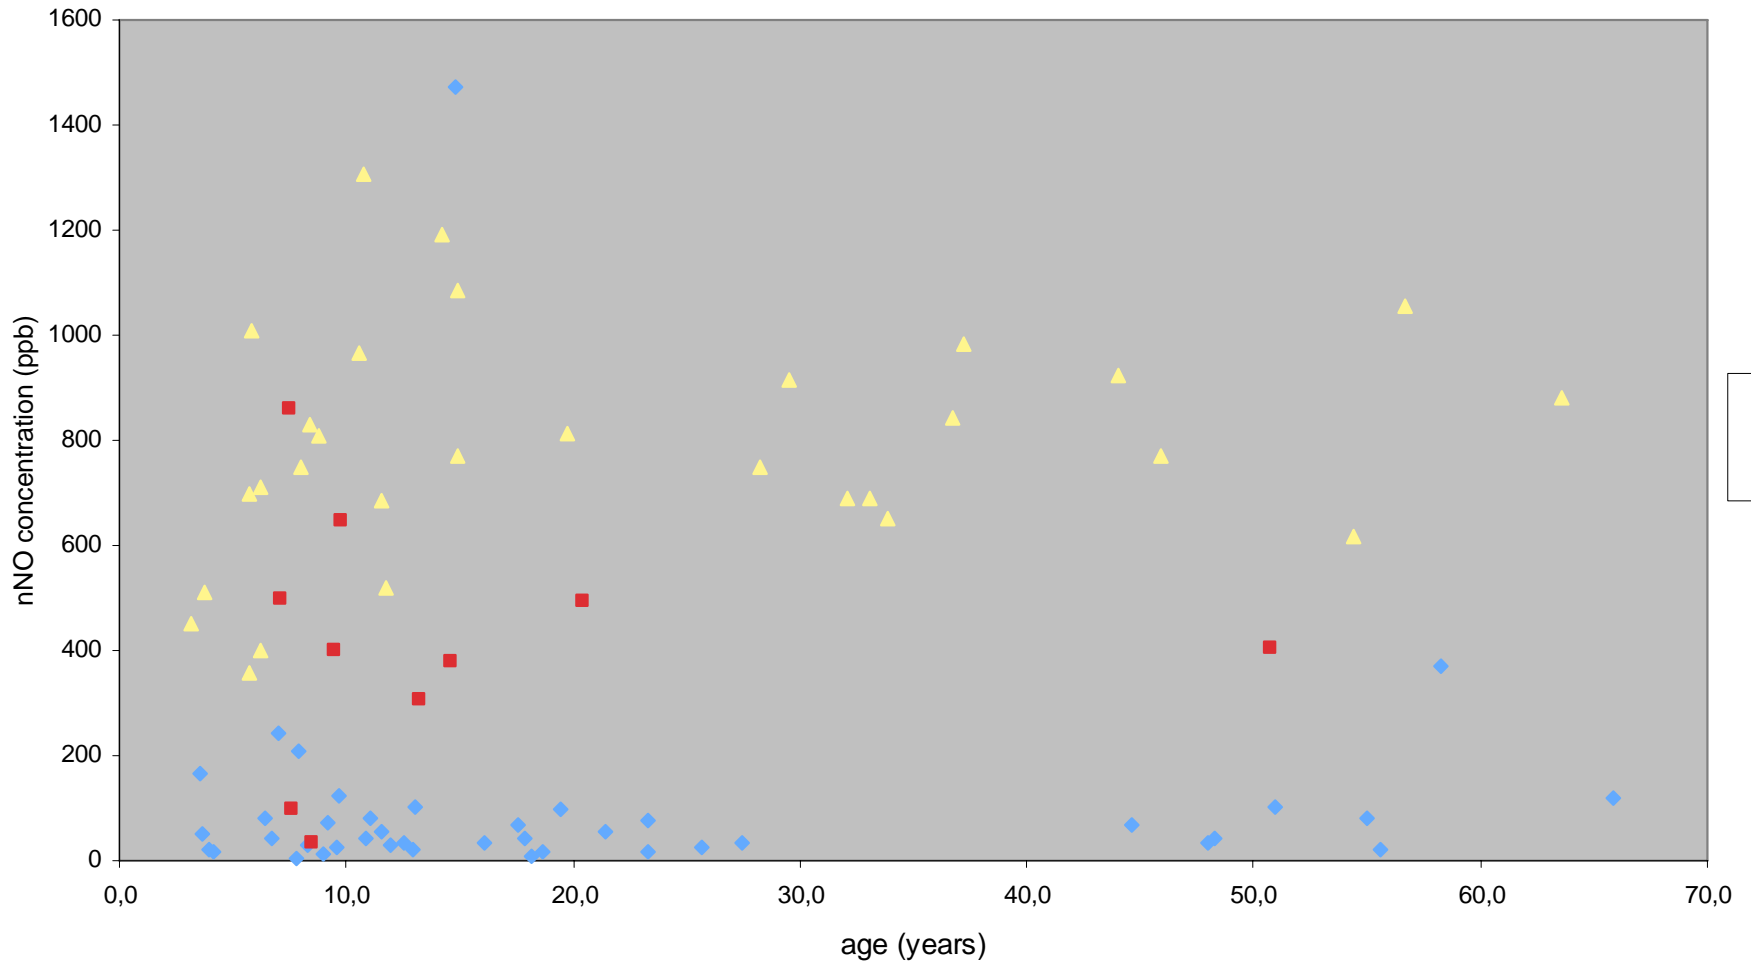

Supplement: Online_Figure_F.pdf [file Online_Figure_F.pdf]
